# Supplementary material for: RNA-based translation activators for targeted gene upregulation
Source: PubMed Central journal article supplement (PMC10603104; doi:10.1038/s41467-023-42252-z), 2023-10-26
Supplement: 41467_2023_42252_MOESM3_ESM.pdf [file 41467_2023_42252_MOESM3_ESM.pdf]

## Reporting Summary

Nature Portfolio wishes to improve the reproducibility of the work that we publish. This form provides structure for consistency and transparency in reporting. For further information on Nature Portfolio policies, see our [Editorial Policies](#) and the [Editorial Policy Checklist](#).

### Statistics

For all statistical analyses, confirm that the following items are present in the figure legend, table legend, main text, or Methods section.

n/a Confirmed

- The exact sample size ( $n$ ) for each experimental group/condition, given as a discrete number and unit of measurement
- A statement on whether measurements were taken from distinct samples or whether the same sample was measured repeatedly
- The statistical test(s) used AND whether they are one- or two-sided  
*Only common tests should be described solely by name; describe more complex techniques in the Methods section.*
- A description of all covariates tested
- A description of any assumptions or corrections, such as tests of normality and adjustment for multiple comparisons
- A full description of the statistical parameters including central tendency (e.g. means) or other basic estimates (e.g. regression coefficient) AND variation (e.g. standard deviation) or associated estimates of uncertainty (e.g. confidence intervals)
- For null hypothesis testing, the test statistic (e.g.  $F$ ,  $t$ ,  $r$ ) with confidence intervals, effect sizes, degrees of freedom and  $P$  value noted  
*Give  $P$  values as exact values whenever suitable.*
- For Bayesian analysis, information on the choice of priors and Markov chain Monte Carlo settings
- For hierarchical and complex designs, identification of the appropriate level for tests and full reporting of outcomes
- Estimates of effect sizes (e.g. Cohen's  $d$ , Pearson's  $r$ ), indicating how they were calculated

*Our web collection on [statistics for biologists](#) contains articles on many of the points above.*

### Software and code

Policy information about [availability of computer code](#)

Data collection

Data analysis

For manuscripts utilizing custom algorithms or software that are central to the research but not yet described in published literature, software must be made available to editors and reviewers. We strongly encourage code deposition in a community repository (e.g. GitHub). See the Nature Portfolio [guidelines for submitting code & software](#) for further information.

### Data

Policy information about [availability of data](#)

All manuscripts must include a [data availability statement](#). This statement should provide the following information, where applicable:

- Accession codes, unique identifiers, or web links for publicly available datasets
- A description of any restrictions on data availability
- For clinical datasets or third party data, please ensure that the statement adheres to our [policy](#)

## Research involving human participants, their data, or biological material

Policy information about studies with [human participants or human data](#). See also policy information about [sex, gender \(identity/presentation\), and sexual orientation](#) and [race, ethnicity and racism](#).

|                                                                    |                                                                                                                                                              |
|--------------------------------------------------------------------|--------------------------------------------------------------------------------------------------------------------------------------------------------------|
| Reporting on sex and gender                                        | Sex or gender analysis was not needed for this study.                                                                                                        |
| Reporting on race, ethnicity, or other socially relevant groupings | Socially relevant groups analysis was not needed for this study.                                                                                             |
| Population characteristics                                         | No population characteristics analysis was needed for this study.                                                                                            |
| Recruitment                                                        | The participating subject was recruited within a dedicated Primary Synaptopathy clinic at Texas Children's Hospital in Houston, Texas.                       |
| Ethics oversight                                                   | Ethic approval for patient-derived cells was obtained from the Institutional Review Board for Baylor College of Medicine and Affiliated Hospitals (H-30480). |

Note that full information on the approval of the study protocol must also be provided in the manuscript.

## Field-specific reporting

Please select the one below that is the best fit for your research. If you are not sure, read the appropriate sections before making your selection.

Life sciences  Behavioural & social sciences  Ecological, evolutionary & environmental sciences

For a reference copy of the document with all sections, see [nature.com/documents/nr-reporting-summary-flat.pdf](https://www.nature.com/documents/nr-reporting-summary-flat.pdf)

## Life sciences study design

All studies must disclose on these points even when the disclosure is negative.

|                 |                                                                                                                                              |
|-----------------|----------------------------------------------------------------------------------------------------------------------------------------------|
| Sample size     | No statistical methods were used to predetermine sample sizes. Our sample size are comparable to similar studies, and statistic significant. |
| Data exclusions | Data were excluded from analysis only in the instance of technical failure.                                                                  |
| Replication     | All data were acquired from at least three biological replicates. Data were reproduced by different people.                                  |
| Randomization   | Mice were randomly selected for injection with control or treatment. In vitro experiments were not randomized.                               |
| Blinding        | No blinding is needed because the samples were analyzed by western blots with internal control.                                              |

## Reporting for specific materials, systems and methods

We require information from authors about some types of materials, experimental systems and methods used in many studies. Here, indicate whether each material, system or method listed is relevant to your study. If you are not sure if a list item applies to your research, read the appropriate section before selecting a response.

### Materials & experimental systems

| n/a                                 | Involved in the study                                           |
|-------------------------------------|-----------------------------------------------------------------|
| <input type="checkbox"/>            | <input checked="" type="checkbox"/> Antibodies                  |
| <input type="checkbox"/>            | <input checked="" type="checkbox"/> Eukaryotic cell lines       |
| <input checked="" type="checkbox"/> | <input type="checkbox"/> Palaeontology and archaeology          |
| <input type="checkbox"/>            | <input checked="" type="checkbox"/> Animals and other organisms |
| <input checked="" type="checkbox"/> | <input type="checkbox"/> Clinical data                          |
| <input checked="" type="checkbox"/> | <input type="checkbox"/> Dual use research of concern           |
| <input checked="" type="checkbox"/> | <input type="checkbox"/> Plants                                 |

### Methods

| n/a                                 | Involved in the study                           |
|-------------------------------------|-------------------------------------------------|
| <input checked="" type="checkbox"/> | <input type="checkbox"/> ChIP-seq               |
| <input checked="" type="checkbox"/> | <input type="checkbox"/> Flow cytometry         |
| <input checked="" type="checkbox"/> | <input type="checkbox"/> MRI-based neuroimaging |

## Antibodies

|                 |                                                                                                                                                                     |
|-----------------|---------------------------------------------------------------------------------------------------------------------------------------------------------------------|
| Antibodies used | Anti-GAPDH (HRP) (HRP-60004; Proteintech; 1:5000)<br>Anti- $\alpha$ -Tubulin (HRP) (HRP-66031; Proteintech; 1:5000)<br>Anti-ABCA7 (25339-1-AP; Proteintech; 1:1000) |
|-----------------|---------------------------------------------------------------------------------------------------------------------------------------------------------------------|

Anti-PTEN (sc-7974; Santa Cruz Biotechnology; 1:1000)  
 Anti-PMP22 (sc-515199; Santa Cruz Biotechnology; 1:1000)  
 Anti-PPIB (sc-130626; Santa Cruz Biotechnology; 1:1000)  
 Anti-CDKN1A (sc-6246; Santa Cruz Biotechnology; 1:1000)  
 Anti-SynGAP1 (PA1-046; Invitrogen; 1:1000)  
 Anti-Phospho-p44/42 MAPK (Erk1/2) (4370T; Cell Signaling Technology; 1:2000)  
 Anti-p44/42 MAPK (Erk1/2) (4695; Cell Signaling Technology; 1:2000)  
 Anti-Mouse IgG H&L (HRP) (ab6728; Abcam; 1:5000)  
 Anti-Rabbit IgG H&L (HRP) (ab6721; Abcam; 1:5000)

## Validation

All antibodies are widely used and have been validated for Western blots by manufacturers with statement in their product information.

## Eukaryotic cell lines

Policy information about [cell lines and Sex and Gender in Research](#)

## Cell line source(s)

HEK293T (CRL-3216), HepG2 (HB-8065), MDA-MB-231 (CRM-HTB-26), NIH/3T3 (CRL-1658) and Neuro-2a cells (CCL-131) were all purchased from ATCC. Patient-derived cells

## Authentication

All cell lines were authenticated by ATCC.

## Mycoplasma contamination

All cell lines tested negative for mycoplasma contamination.

Commonly misidentified lines  
(See [ICLAC](#) register)

HEK293T is listed in the database of commonly misidentified cell lines. This cell line is used as a screening platform, whose identity is not relevant.

## Animals and other research organisms

Policy information about [studies involving animals; ARRIVE guidelines](#) recommended for reporting animal research, and [Sex and Gender in Research](#)

## Laboratory animals

Female BALB/C mus musculus (aged 5-6 weeks) were used in this work. E18 Sprague Dawley rats were used to isolate cortical neurons.

## Wild animals

No wild animals were used.

## Reporting on sex

No sex analysis was performed.

## Field-collected samples

No field-collected samples were involved.

## Ethics oversight

Animal studies were approved by the Institutional Animal Care and Use Committee (IACUC) at the University of Chicago (Protocol Number: 72613, and 72016).

Note that full information on the approval of the study protocol must also be provided in the manuscript.
