# Supplementary material for: RNA-based translation activators for targeted gene upregulation
Source: Nat Commun. 2023 Oct 26;14:6827. doi: 10.1038/s41467-023-42252-z (PMC10603104; doi:10.1038/s41467-023-42252-z)
Supplement: Supplementary file 4 — Source Data [file 41467_2023_42252_MOESM4_ESM.xlsx]

## Sheet: Fig.1
	Fig. 1c Fluc signal/ Rluc signal normalized to vector
	vector	vector	NT-CrPV	Fluc-CrPV	NT-HCV	Fluc-HCV	NT-EMCV	Fluc-EMCV	NT-PTV	Fluc-PTV
	0.988619	0.804355	1.04204	0.969922	0.998275	2.07355	0.974281	1.41654	1.03117	2.34595
	1.04355	0.831242	1.13784	1.35771	1.12539	1.51669	1.08556	2.14109	1.01809	2.05016
	0.990756	1.0279	1.06986	1.48013	1.06152	1.65932	0.93243	2.37531	1.1235	1.63617
	0.977075	1.3365	1.07734	0.931315	1.13241	1.41752	1.05282	2.35508	1.13809	2.24346
		Test pair	NT-CrPV vs. Fluc-CrPV		NT-HCV vs. Fluc-HCV		NT-EMCV vs. Fluc-EMCV		NT-PTV vs. Fluc-PTV
		P value	0.9499		0.0038		<0.0001		<0.0001
	Fig. 1d Relative mRNA level of Fluc/Rluc normalized to vector
	vector	Fluc-PTV	Fluc-EMCV	Fluc-HCV	Fluc-CrPV
	1.07774	1.33793	1.13054	0.910043	1.0629
	0.929165	0.899382	1.19169	1.25528	1.25267
	0.993097	0.84382	1.01537	1.27988	1.429
	Test vector vs.	Fluc-PTV	Fluc-EMCV	Fluc-HCV	Fluc-CrPV
	P value	0.999	0.8575	0.7148	0.325
	Fig. 1e Fluc signal/ Rluc signal normalized normalized to NT-PTV
	NT-PTV	g5'-PTV	gCDS-1-PTV	g3'-1-PTV
	0.973047	1.11324	0.999559	1.99551
	0.941372	1.1337	0.709029	2.37749
	1.06776	1.16285	0.78163	1.709
	1.01782	1.16777	1.22646	1.87822
	Test NT-PTV vs.	g5'-PTV	gCDS-1-PTV	g3'-1-PTV
	P value	0.5755	0.9078	<0.0001

## Sheet: Fig.2
	Fig. 2a Intensity of PTEN/GAPDH normalized to NT-PTV				Fig. 2b Intensity of PPIB/GAPDH normalized to NT-PTV
	NT	PTEN-g1	PTEN-g2		NT	PPIB-g4	PPIB-g5
	1.05533	1.41753	1.22703		1	1.3428	1.28974
	0.944674	1.12227	1.54817		1.14879	1.43772	1.28458
	1	1.24735	1.80242		0.85121	1.27009	1.61309
	1	1.46	2.30175
					Test NT vs.	PPIB-g4	PPIB-g5
	Test NT vs.	PTEN-g1	PTEN-g2		P value	0.0464	0.0288
	P value	0.2459	0.0096
	Fig. 2c Intensity of p21/GAPDH normalized to NT-PTV				Fig. 2d Intensity of ABCA7/α-tubulin normalized to NT-PTV
	NT	p21-g1	p21-g2		NT	ABCA7-g1	ABCA7-g2
	0.889202	1.18331	1.33142		0.647021	1.83449	1.90856
	1.1108	1.16194	1.52449		1.35298	1.81919	2.17912
	1	0.897167	1.25894		1	1.92586	1.8943
	1	1.05973	1.40205
					Test NT vs.	ABCA7-g1	ABCA7-g2
	Test NT vs.	p21-g1	p21-g2		P value	0.0063	0.0031
	P value	0.5582	0.0019

## Sheet: Fig.3
	Fig. 3b Fluc signal/ Rluc signal normalized to vector
	vector	HCV-IIIabcU228C	CSFV-IIIabc	HCV-IIIabc	PTV-IIIab
	0.877333	1.39938	1.50578	1.58651	1.90461
	0.873915	1.18614	1.77255	1.7905	1.9444
	1.11868	1.213	2.15996	1.94158	2.09637
	1.13007	1.19344	1.64193	2.35068	2.26821
	Test pair	vector vs. HCV-IIIabcU228C	vector vs. CSFV-IIIabc	vector vs. HCV-IIIabc	vector vs. PTV-IIIab	HCV-IIIabcU228C vs. HCV-IIIabc
	P value	0.5074	0.0009	0.0001	<0.0001	0.0032
	Fig. 3d Fluc signal/ Rluc signal normalized to vector
	vector	NT	mis-g3'-1	g3'-1
	0.912094	1.18691	1.23229	1.78789
	1.04376	1.13854	1.16902	1.84769
	1.25002	1.18929	1.16	1.52438
	0.794126	1.28251	1.38499	1.51327
	Test pair	vector vs. NT	vector vs. mis-g3'-1	vector vs. g3'-1	mis-g3'-1 vs. g5-PTV-III-t1
	P value	0.3201	0.1689	<0.0001	<0.0001
	Fig. 3e Intensity of PTEN/GAPDH normalized to NT-PTV-IIIab
	NT	0.787343	0.901924	1.03684	1.27389	1.02441	1.16142	0.814171
	PTEN	1.62765	1.88557	1.59553	1.94258	1.28688	2.30736	2.21516
	Test pair	NT vs PTEN
	P value	0.0004
	Fig. 3f Intensity of SYNGAP1/α-tubulin normalized to NT-PTV-IIIab				Fig. 3g Intensity of PMP22/GAPDH normalized to NT-PTV-IIIab
	NT	mSyngap1-g1	mSyngap1-g2		NT	mPMP22-g1	mPMP22-g2
	0.830982	1.25831	1.19427		0.968044	1.40498	1.31165
	1.16902	1.61675	1.55342		1.01064	1.4716	1.2612
	1	1.52243	1.79523		1.02132	1.26343	1.46214
	1	1.49689	1.58152
					Test NT vs.	mPMP22-g1	mPMP22-g2
	Test NT vs.	mSyngap1-g1	mSyngap1-g2		P value	0.0033	0.0053
	P value	0.0107	0.0055
	Fig. 3h Cell growth rate normalized to NT-PTVIIIab (%)
	NT	PTEN	CDKN1A	PTEN+CDKN1A
	82.2222	83.8384	70.101	34.3434
	90.101	83.4343	73.7374	43.4343
	116.566	106.869	100.202	62.0202
	102.626	109.091	89.0909	46.2626
	98.1818	86.6667	80.404	38.9899
	110.303	96.7677	75.1515	50.9091
	Test NT vs.	PTEN	CDKN1A	PTEN+CDKN1A
	P value	0.7348	0.0274	<0.0001

## Sheet: Fig.4
	Fig. 4b Intensity of PTEN/GAPDH normalized to NT-PTV-IIIab			Fig. 4d Intensity of PTEN/GAPDH normalized to NT-PTV-IIIab
	NT	mPTEN		NT	mPTEN
	0.891369	1.70023		1.04009	1.11637
	1.12395	1.15856		0.922249	1.40234
	0.893324	1.36348		0.991607	1.4317
	1.09136	1.36668		1.04605	1.32591
	Test pair	NT vs mPTEN		Test pair	NT vs mPTEN
	P value	0.0213		P value	0.0059
	Fig. 4e Intensity normalized to NT-PTV-IIIab
		NT				mSYNGAP1
	SYNGAP1/α-tubulin	0.903009	0.957944	0.97831	1.16074	1.45804	1.24696	1.49769	1.59257
	p-ERK/ERK	1.20776	0.94942	0.840066	1.00276	0.816722	0.593789	0.729662	0.782566
	Test NT vs mSYNGAP1	SYNGAP1/α-tubulin	p-ERK/ERK
	P value	0.003306	0.0313
	Fig. 4f Intensity normalized to NT-PTV-IIIab
		NT			rSYNGAP1
	SYNGAP1/α-tubulin	0.961283	0.88467	1.15405	1.27032	1.37137	1.33254
	p-ERK/ERK	0.965365	1.12633	0.908301	0.69844	0.510357	0.678666
	Test NT vs rSYNGAP1	SYNGAP1/α-tubulin	p-ERK/ERK
	P value	0.0428	0.021

## Sheet: Fig.5
	Fig. 5a Intensity of SYNGAP1/α-tubulin normalized to NT-PTV-IIIab
	NT	g1	g3	g4	g5
	1.02156	1.692	2.3961	2.35334	2.08077
	0.928281	1.61032	1.74519	2.2742	2.04957
	1.05016	1.7706	1.88982	2.11449	1.99813
	Test pair	NT vs. g1	NT vs. g3	NT vs. g4	NT vs. g5	g1 vs. g4
	P value	0.0027	0.0001	<0.0001	<0.0001	0.0122
	Fig. 5c Intensity of SYNGAP1/α-tubulin normalized to the mean of NT-PTV-IIIab and NT-mini
		NT				g4
	mini	0.88298	1.10827	0.921001	1.1339	1.86478	1.94804	1.80703	1.91095
	PTV-IIIab	0.967308	1.04144	0.948834	0.996265	1.92756	1.9365	1.88079	2.02043
	Test NT vs g4	mini	PTV-IIIab
	P value	<0.0001	<0.0001
	Fig. 5d Intensity of SYNGAP1/α-tubulin normalized to NT-mini			Fig. 5e Intensity normalized to NT-mini
	NT	hSYNGAP1			NT			hSYNGAP1
	0.955521	1.56293		SYNGAP1/α-tubulin	0.781562	0.69445	1.13587	1.69422	1.9706	2.32426
	0.943958	1.84294		p-ERK/ERK	0.935918	0.978191	1.19089	0.58458	0.713609	0.644021
	0.987658	2.07985
				Test NT vs hSYNGAP1	SYNGAP1/α-tubulin	p-ERK/ERK
	Test pair	NT vs hSYNGAP1		P value	0.0077	0.0113
	P value	0.0045

## Sheet: Supplementary Fig.1
	Supplementary Fig. 1b Fluc signal/ Rluc signal
		empty vector			Fluc g3'-1-PTV
	ATTG	339.311	393.647	310.813	584.898	490.216	602.255
	ATCC	356.106	347.425	467.418	432.088	537.232	525.599
	CGCG	809.335	735.511	906.681	853.273	922.854	848.119
	CACC	808.412	1000.25	878.613	839.396	789.119	740.027
	Test empty vector vs Fluc g3'-1-PTV		ATTG	ATCC	CGCG	CACC
	P value		0.0045	0.2198	0.7556	0.2324
	Supplementary Fig. 1c Fluc signal/ Rluc signal normalized to vector					Supplementary Fig. 1d Relative mRNA level of Fluc/Rluc normalized to vector
	vector	Fluc-PV	Fluc-FMDV	Fluc-c-myc		vector	Fluc-PV	Fluc-FMDV	Fluc-c-myc
	0.942009	2.24097	2.16432	1.39415		1.11987	0.851061	1.04996	1.2443
	1.01246	2.71932	1.8822	1.89089		0.945621	1.06757	0.973555	1.15535
	0.859745	1.75735	1.872	1.6851		1.07574	1.20525	1.25122	1.15215
	1.18578	1.89926	2.25857	2.05983		0.858764	1.31251	1.30164	1.12532
	Test vector vs.	Fluc-PV	Fluc-FMDV	Fluc-c-myc		Test vector vs.	Fluc-PV	Fluc-FMDV	Fluc-c-myc
	P value	0.0003	0.0006	0.0071		P value	0.5851	0.3812	0.2668
	Supplementary Fig. 1e Fluc signal/ Rluc signal normalized to vector						Supplementary Fig. 1f Fluc signal/ Rluc signal normalized to vector
	vector	Fluc-CrPV	Fluc-HCV	Fluc-EMCV	Fluc-PTV		vector	Fluc-CrPV	Fluc-HCV	Fluc-EMCV	Fluc-PTV
	0.901467	1.25373	1.35276	1.34759	1.31878		1.00462	1.21775	1.17326	1.35096	1.47678
	0.890888	1.14541	1.54068	1.65583	1.4076		0.978315	0.962199	1.51562	1.31851	1.69281
	1.25257	1.28537	1.46829	1.6824	1.16212		1.03429	0.937645	1.27756	1.42031	1.49783
	0.955073	1.29972	1.58497	1.80713	1.35087		0.982768	1.20441	1.2804	1.86366	1.62827
	Test vector vs.	Fluc-CrPV	Fluc-HCV	Fluc-EMCV	Fluc-PTV		Test vector vs.	Fluc-CrPV	Fluc-HCV	Fluc-EMCV	Fluc-PTV
	P value	0.0705	0.0005	<0.0001	0.0197		P value	0.8724	0.0396	0.0016	0.0004
	Supplementary Fig. 1h Fluc signal/ Rluc signal normalized normalized to NT-PTV
	NT	g5'	gCDS-1	gCDS-2	gCDS-3	gCDS-4	gCDS-5	g3'-1	g3'-2
	1.06258	1.26275	1.43662	1.27223	1.30292	1.61249	1.68183	2.03588	1.5302
	0.904746	1.94744	1.05847	1.20236	1.40706	1.31836	1.25761	2.3852	1.82378
	1.03268	2.01809	1.21365	1.31108	1.51303	1.30796	0.983138	1.97764	1.96205
	Test NT-PTV vs.	g5'	gCDS-1	gCDS-2	gCDS-3	gCDS-4	gCDS-5	g3'-1	g3'-2
	P value	0.0062	0.7296	0.6377	0.2137	0.2037	0.4775	<0.0001	0.0045
	Supplementary Fig. 1i Fluc signal/ Rluc signal normalized normalized to 0nt-PTV
	0nt-PTV	15nt-PTV	20nt-PTV	30nt-PTV	40nt-PTV	50nt-PTV
	1.11006	1.0952	1.10397	1.8413	2.21649	1.50939
	0.943281	1.03189	1.28519	1.84237	2.72253	2.10575
	1.02438	1.17047	1.43628	1.76222	1.78139	1.26151
	0.922277	1.53534	1.36122	2.9664	1.73591	2.6227
	Test 0nt-PTV vs.	15nt-PTV	20nt-PTV	30nt-PTV	40nt-PTV	50nt-PTV
	P value	0.9203	0.7557	0.0053	0.0049	0.0286
	Supplementary Fig. 1j Fluc signal/ Rluc signal normalized normalized to PTV
	PTV	PTV-g3'-1	g3'-1-PTV
	0.96866	1.04344	1.28586
	0.968739	1.13039	1.52954
	0.982392	1.14167	1.41518
	1.08021	1.25096	1.14172
	Test PTV vs.	PTV-g3'-1	g3'-1-PTV
	P value	0.1851	0.0037

## Sheet: Supplementary Fig.2
	Supplementary Fig. 2f Relative mRNA level of PTEN/GAPDH normalized to NT-PTV					Supplementary Fig. 2g Relative mRNA level of PPIB/GAPDH normalized to NT-PTV
	NT-PTV	g1(PTEN)-PTV	g2(PTEN)-PTV			NT-PTV	g1(PPIB)-PTV	g2(PPIB)-PTV
	0.927012	0.646472	0.847132			1.21082	0.930441	1.24486
	1.23171	0.678612	0.692871			0.798844	0.924014	0.862136
	0.841281	0.895434	0.779521			0.990334	0.956599	0.924014
	Test NT-PTV vs.	g1(PTEN)-PTV	g2(PTEN)-PTV			Test NT-PTV vs.	g1(PPIB)-PTV	g2(PPIB)-PTV
	P value	0.1293	0.1854			P value	0.8627	0.9958
	Supplementary Fig. 2h Relative mRNA level of CDKN1A/GAPDH normalized to NT-PTV					Supplementary Fig. 2i Relative mRNA level of ABCA7/α-tubulin normalized to NT-PTV
	NT-PTV	g1(CDKN1A)-PTV	g2(CDKN1A)-PTV			NT-PTV	g1(ABCA7)-PTV	g2(ABCA7)-PTV
	0.761657	0.970779	1.05498			0.941628	0.960908	0.949016
	1.09978	0.918413	0.887128			1.03972	0.691889	0.822441
	1.13856	0.9508	0.676994			1.20985	0.624725	0.944464
						0.808796	0.783742	0.96063
	Test NT-PTV vs.	g1(CDKN1A)-PTV	g2(CDKN1A)-PTV
	P value	0.892	0.5646			Test NT-PTV vs.	g1(ABCA7)-PTV	g2(ABCA7)-PTV
						P value	0.0625	0.6185
	Supplementary Fig. 2j Intensity of PTEN/GAPDH normalized to NT-PTV
	NT-PTV	g2(PTEN)-PTV
	1.13322	1.71168
	0.883386	2.0095
	0.983396	2.35297
	Test pair	NT-PTV vs. PTEN
	P value	0.0067
	Supplementary Fig. 2l Relative mRNA level of PTEN/GAPDH
		vector				PTEN-PTV
	monosome	0.00583925	0.00600342	0.00612956	0.00612956	0.00713931	0.00684848	0.00723897	0.00608722
	light polysome	0.0112028	0.0113592	0.0129581	0.0112028	0.0114382	0.0115978	0.013139	0.0124303
	heavy polysome	0.00526263	0.00548611	0.00552427	0.00537321	0.00759887	0.00792156	0.0078125	0.00803214
	Test vector vs PTEN-PTV		monosome	light polysome	heavy polysome
	P value		0.1329	0.5366	<0.0001

## Sheet: Supplementary Fig.2k
Supplementary Fig.2k A260 values measured with the sucrose gradient
	vector	g2(PTEN)-PTV
	0.897	0.909
	0.89	0.903
	0.883	0.896
	0.873	0.889
	0.867	0.883
	0.86	0.877
	0.853	0.871
	0.846	0.865
	0.839	0.86
	0.832	0.853
	0.824	0.846
	0.817	0.838
	0.811	0.832
	0.804	0.825
	0.798	0.819
	0.791	0.812
	0.785	0.805
	0.779	0.798
	0.773	0.792
	0.767	0.786
	0.76	0.782
	0.754	0.779
	0.747	0.775
	0.741	0.77
	0.734	0.764
	0.727	0.758
	0.72	0.753
	0.714	0.748
	0.709	0.744
	0.703	0.74
	0.697	0.732
	0.69	0.726
	0.684	0.719
	0.678	0.713
	0.672	0.708
	0.663	0.703
	0.659	0.698
	0.654	0.693
	0.65	0.688
	0.645	0.684
	0.639	0.679
	0.634	0.675
	0.629	0.669
	0.623	0.663
	0.617	0.657
	0.613	0.652
	0.609	0.647
	0.605	0.643
	0.6	0.638
	0.595	0.633
	0.59	0.629
	0.585	0.627
	0.579	0.625
	0.574	0.623
	0.57	0.62
	0.565	0.618
	0.56	0.614
	0.555	0.611
	0.55	0.606
	0.544	0.602
	0.539	0.599
	0.535	0.594
	0.53	0.59
	0.525	0.585
	0.521	0.581
	0.517	0.577
	0.511	0.572
	0.507	0.568
	0.505	0.565
	0.501	0.561
	0.496	0.558
	0.492	0.554
	0.488	0.551
	0.483	0.547
	0.478	0.543
	0.473	0.539
	0.471	0.534
	0.469	0.53
	0.466	0.527
	0.461	0.523
	0.456	0.52
	0.452	0.517
	0.448	0.515
	0.443	0.512
	0.44	0.509
	0.436	0.506
	0.433	0.503
	0.431	0.5
	0.43	0.498
	0.428	0.497
	0.425	0.496
	0.423	0.494
	0.421	0.493
	0.42	0.491
	0.418	0.49
	0.415	0.489
	0.412	0.485
	0.41	0.482
	0.406	0.479
	0.404	0.477
	0.402	0.475
	0.4	0.471
	0.398	0.467
	0.397	0.464
	0.395	0.462
	0.394	0.46
	0.394	0.457
	0.391	0.454
	0.39	0.45
	0.388	0.447
	0.386	0.445
	0.383	0.443
	0.38	0.442
	0.379	0.439
	0.377	0.434
	0.376	0.431
	0.375	0.43
	0.374	0.428
	0.373	0.425
	0.371	0.423
	0.37	0.422
	0.368	0.422
	0.368	0.42
	0.366	0.417
	0.364	0.414
	0.363	0.412
	0.362	0.412
	0.36	0.41
	0.357	0.409
	0.354	0.406
	0.351	0.404
	0.35	0.402
	0.348	0.4
	0.348	0.399
	0.347	0.398
	0.346	0.395
	0.344	0.393
	0.342	0.39
	0.341	0.387
	0.339	0.386
	0.337	0.385
	0.335	0.384
	0.333	0.383
	0.332	0.382
	0.332	0.381
	0.331	0.379
	0.329	0.377
	0.327	0.374
	0.325	0.373
	0.324	0.371
	0.322	0.369
	0.32	0.368
	0.319	0.368
	0.319	0.369
	0.318	0.368
	0.317	0.366
	0.316	0.362
	0.314	0.359
	0.313	0.357
	0.311	0.356
	0.31	0.355
	0.31	0.356
	0.309	0.356
	0.309	0.355
	0.307	0.354
	0.306	0.353
	0.305	0.352
	0.304	0.351
	0.302	0.35
	0.301	0.348
	0.3	0.347
	0.299	0.346
	0.298	0.345
	0.298	0.343
	0.299	0.343
	0.298	0.342
	0.297	0.341
	0.296	0.34
	0.295	0.339
	0.295	0.338
	0.295	0.338
	0.295	0.337
	0.295	0.337
	0.295	0.337
	0.295	0.337
	0.295	0.337
	0.296	0.336
	0.296	0.336
	0.296	0.337
	0.296	0.337
	0.296	0.337
	0.296	0.337
	0.296	0.337
	0.296	0.336
	0.297	0.336
	0.298	0.337
	0.299	0.338
	0.299	0.339
	0.299	0.338
	0.3	0.337
	0.302	0.337
	0.304	0.337
	0.305	0.337
	0.306	0.337
	0.306	0.338
	0.307	0.338
	0.307	0.339
	0.308	0.34
	0.308	0.341
	0.309	0.341
	0.31	0.341
	0.311	0.342
	0.313	0.344
	0.314	0.345
	0.315	0.346
	0.315	0.347
	0.316	0.347
	0.318	0.348
	0.32	0.349
	0.321	0.351
	0.323	0.352
	0.323	0.353
	0.323	0.353
	0.325	0.353
	0.326	0.355
	0.328	0.356
	0.329	0.357
	0.332	0.359
	0.335	0.36
	0.336	0.361
	0.338	0.363
	0.339	0.364
	0.34	0.365
	0.342	0.366
	0.344	0.367
	0.346	0.368
	0.348	0.37
	0.35	0.371
	0.352	0.372
	0.354	0.374
	0.356	0.375
	0.358	0.377
	0.359	0.378
	0.361	0.38
	0.364	0.382
	0.366	0.383
	0.369	0.385
	0.373	0.386
	0.376	0.388
	0.378	0.391
	0.381	0.393
	0.383	0.395
	0.385	0.397
	0.387	0.398
	0.389	0.4
	0.392	0.403
	0.394	0.405
	0.395	0.407
	0.398	0.409
	0.4	0.411
	0.403	0.413
	0.404	0.416
	0.408	0.418
	0.41	0.421
	0.412	0.423
	0.413	0.425
	0.415	0.427
	0.418	0.43
	0.419	0.432
	0.42	0.434
	0.422	0.436
	0.424	0.438
	0.426	0.44
	0.428	0.443
	0.43	0.445
	0.432	0.448
	0.434	0.45
	0.435	0.452
	0.436	0.454
	0.437	0.456
	0.439	0.459
	0.44	0.461
	0.44	0.462
	0.442	0.464
	0.443	0.466
	0.445	0.468
	0.446	0.47
	0.448	0.472
	0.449	0.474
	0.45	0.476
	0.451	0.478
	0.452	0.48
	0.453	0.481
	0.455	0.484
	0.456	0.485
	0.457	0.487
	0.458	0.489
	0.458	0.49
	0.459	0.491
	0.46	0.493
	0.461	0.494
	0.461	0.495
	0.461	0.496
	0.462	0.497
	0.462	0.498
	0.463	0.499
	0.463	0.5
	0.463	0.501
	0.463	0.502
	0.463	0.503
	0.464	0.504
	0.463	0.504
	0.463	0.505
	0.463	0.506
	0.463	0.506
	0.463	0.506
	0.463	0.507
	0.463	0.507
	0.463	0.508
	0.462	0.508
	0.461	0.508
	0.461	0.509
	0.461	0.51
	0.461	0.51
	0.46	0.509
	0.46	0.509
	0.46	0.509
	0.458	0.509
	0.458	0.508
	0.457	0.508
	0.456	0.507
	0.456	0.507
	0.455	0.506
	0.455	0.506
	0.454	0.506
	0.453	0.505
	0.452	0.504
	0.451	0.503
	0.45	0.503
	0.449	0.502
	0.448	0.501
	0.447	0.5
	0.446	0.5
	0.445	0.499
	0.444	0.498
	0.443	0.497
	0.442	0.496
	0.44	0.495
	0.439	0.494
	0.438	0.492
	0.437	0.491
	0.435	0.49
	0.434	0.489
	0.433	0.487
	0.431	0.486
	0.43	0.485
	0.428	0.483
	0.427	0.481
	0.425	0.48
	0.424	0.479
	0.422	0.478
	0.421	0.478
	0.419	0.476
	0.417	0.475
	0.415	0.473
	0.414	0.472
	0.412	0.471
	0.41	0.469
	0.408	0.468
	0.407	0.467
	0.405	0.465
	0.403	0.464
	0.401	0.462
	0.399	0.46
	0.398	0.458
	0.396	0.457
	0.394	0.455
	0.392	0.453
	0.39	0.452
	0.388	0.45
	0.387	0.448
	0.385	0.446
	0.383	0.445
	0.381	0.444
	0.379	0.442
	0.377	0.44
	0.376	0.438
	0.374	0.436
	0.372	0.435
	0.371	0.433
	0.369	0.431
	0.367	0.428
	0.365	0.426
	0.363	0.424
	0.362	0.423
	0.361	0.421
	0.359	0.419
	0.358	0.418
	0.356	0.416
	0.355	0.414
	0.353	0.412
	0.352	0.41
	0.351	0.409
	0.35	0.407
	0.349	0.405
	0.347	0.404
	0.346	0.402
	0.346	0.401
	0.345	0.4
	0.344	0.398
	0.343	0.397
	0.343	0.396
	0.342	0.395
	0.342	0.394
	0.341	0.393
	0.341	0.392
	0.341	0.391
	0.34	0.39
	0.341	0.389
	0.34	0.389
	0.34	0.388
	0.34	0.388
	0.34	0.387
	0.34	0.387
	0.341	0.388
	0.341	0.388
	0.341	0.387
	0.342	0.388
	0.344	0.388
	0.345	0.388
	0.344	0.387
	0.345	0.388
	0.346	0.389
	0.346	0.39
	0.347	0.391
	0.349	0.391
	0.35	0.392
	0.351	0.393
	0.352	0.394
	0.353	0.395
	0.355	0.397
	0.356	0.399
	0.358	0.4
	0.36	0.402
	0.362	0.404
	0.364	0.406
	0.366	0.408
	0.368	0.41
	0.371	0.413
	0.373	0.415
	0.376	0.417
	0.378	0.42
	0.38	0.422
	0.383	0.425
	0.386	0.429
	0.388	0.433
	0.391	0.436
	0.394	0.439
	0.397	0.442
	0.401	0.446
	0.404	0.449
	0.407	0.453
	0.411	0.457
	0.414	0.461
	0.418	0.465
	0.421	0.469
	0.424	0.473
	0.428	0.478
	0.431	0.482
	0.435	0.487
	0.438	0.491
	0.442	0.496
	0.445	0.5
	0.449	0.505
	0.452	0.51
	0.455	0.515
	0.459	0.519
	0.462	0.524
	0.466	0.529
	0.469	0.534
	0.473	0.539
	0.476	0.544
	0.479	0.549
	0.483	0.554
	0.486	0.559
	0.49	0.567
	0.493	0.571
	0.496	0.576
	0.499	0.581
	0.503	0.586
	0.507	0.59
	0.51	0.595
	0.513	0.6
	0.516	0.605
	0.519	0.609
	0.522	0.613
	0.525	0.618
	0.528	0.622
	0.531	0.626
	0.534	0.63
	0.537	0.634
	0.539	0.638
	0.542	0.642
	0.545	0.645
	0.547	0.649
	0.55	0.653
	0.552	0.656
	0.555	0.659
	0.558	0.663
	0.56	0.666
	0.562	0.668
	0.565	0.671
	0.567	0.674
	0.57	0.677
	0.572	0.679
	0.574	0.681
	0.576	0.684
	0.579	0.686
	0.581	0.689
	0.583	0.691
	0.585	0.695
	0.587	0.696
	0.591	0.698
	0.593	0.7
	0.595	0.702
	0.597	0.704
	0.6	0.706
	0.602	0.708
	0.605	0.71
	0.607	0.712
	0.61	0.714
	0.613	0.716
	0.616	0.717
	0.62	0.72
	0.623	0.722
	0.626	0.724
	0.63	0.726
	0.634	0.728
	0.638	0.731
	0.643	0.734
	0.647	0.736
	0.652	0.74
	0.658	0.743
	0.663	0.746
	0.668	0.75
	0.674	0.754
	0.68	0.758
	0.686	0.762
	0.693	0.767
	0.699	0.772
	0.706	0.777
	0.713	0.785
	0.72	0.79
	0.733	0.796
	0.737	0.802
	0.744	0.808
	0.755	0.813
	0.762	0.819
	0.769	0.825
	0.776	0.832
	0.784	0.838
	0.791	0.845
	0.799	0.852
	0.808	0.859
	0.817	0.867
	0.826	0.875
	0.836	0.883
	0.846	0.891
	0.857	0.899
	0.867	0.908
	0.878	0.917
	0.89	0.926
	0.902	0.936
	0.914	0.946
	0.926	0.957
	0.939	0.968
	0.952	0.979
	0.965	0.991
	0.978	1.003
	0.992	1.015
	1.006	1.028
	1.019	1.031
	1.031	1.031
	1.031	1.031
	1.031	1.031
	1.031	1.031
	1.031	1.031
	1.031	1.031
	1.031	1.031
	1.031	1.031
	1.031	1.031
	1.031	1.031
	1.031	1.031
	1.031	1.031
	1.031	1.031
	1.031	1.031
	1.031	1.031
	1.031	1.031
	1.031	1.031
	1.031	1.031
	1.031	1.031
	1.031	1.031
	1.031	1.031
	1.031	1.031
	1.031	1.031
	1.031	1.031
	1.031	1.031
	1.031	1.031
	1.031	1.031
	1.031	1.031
	1.031	1.031
	1.031	1.031
	1.031	1.031
	1.031	1.031
	1.031	1.031
	1.031	1.031
	1.031	1.031
	1.031	1.031
	1.031	1.031
	1.031	1.031
	1.031	1.031
	1.031	1.031
	1.031	1.031
	1.031	1.031
	1.031	1.031
	1.031	1.031
	1.031	1.031
	1.031	1.031
	1.031	1.031
	1.031	1.031
	1.031	1.031
	1.031	1.031
	1.031	1.031
	1.031	1.031
	1.031	1.031
	1.031	1.031
	1.031	1.031
	1.031	1.031
	1.031	1.031
	1.031	1.031
	1.031	1.031
	1.031	1.031
	1.031	1.031
	1.031	1.031
	1.031	1.031
	1.031	1.031
	1.031	1.031
	1.031	1.031
	1.031	1.031
	1.031	1.031
	1.031	1.031
	1.031	1.031
	1.031	1.031
	1.031	1.031
	1.031	1.031
	1.031	1.031
	1.031	1.031
	1.031	1.031
	1.031	1.031
	1.031	1.031
	1.031	1.031
	1.031	1.031
	1.031	1.031
	1.031	1.031
	1.031	1.031
	1.031	1.031
	1.031	1.031
	1.031	1.031
	1.031	1.031
	1.031	1.031
	1.031	1.031
	1.031	1.031
	1.031	1.031
	1.031	1.031
	1.031	1.031
	1.031	1.031
	1.031	1.031
	1.031	1.031
	1.031	1.031
	1.031	1.031
	1.031	1.031
	1.031	1.031
	1.031	1.031
	1.031	1.031
	1.031	1.031
	1.031	1.031
	1.031	1.031
	1.031	1.031
	1.031	1.031
	1.031	1.031
	1.031	1.031
	1.031	1.031
	1.031	1.031
	1.031	1.031
	1.031	1.031
	1.031	1.031
	1.031	1.031
	1.031	1.031
	1.031	1.031
	1.031	1.031
	1.031	1.031
	1.031	1.031
	1.031	1.031
	1.031	1.031
	1.031	1.031
	1.031	1.031
	1.031	1.031
	1.031	1.031
	1.031	1.031
	1.031	1.031
	1.031	1.031
	1.031	1.031
	1.031	1.031
	1.031	1.031
	1.031	1.031
	1.031	1.031
	1.031	1.031
	1.031	1.031
	1.031	1.031
	1.031	1.031
	1.031	1.031
	1.025	1.031
	1.013	1.031
	1.003	1.03
	0.992	1.021
	0.982	1.012
	0.972	1.003
	0.962	0.994
	0.952	0.985
	0.943	0.977
	0.933	0.968
	0.924	0.96
	0.915	0.951
	0.906	0.943
	0.898	0.935
	0.889	0.927
	0.88	0.919
	0.873	0.911
	0.864	0.904
	0.857	0.896
	0.849	0.889
	0.842	0.881
	0.834	0.874
	0.827	0.862
	0.82	0.855
	0.813	0.848
	0.805	0.841
	0.798	0.834
	0.791	0.827
	0.781	0.82
	0.774	0.813
	0.768	0.807
	0.762	0.8
	0.756	0.794
	0.75	0.787
	0.744	0.781
	0.738	0.775
	0.732	0.769
	0.727	0.763
	0.721	0.757
	0.716	0.751
	0.71	0.745
	0.705	0.739
	0.7	0.733
	0.695	0.728
	0.689	0.722
	0.684	0.717
	0.68	0.711
	0.674	0.706
	0.669	0.701
	0.665	0.696
	0.66	0.691
	0.655	0.686
	0.651	0.681
	0.646	0.676
	0.642	0.669
	0.637	0.664
	0.633	0.66
	0.629	0.655
	0.624	0.651
	0.618	0.646
	0.614	0.642
	0.609	0.637
	0.605	0.633
	0.601	0.629
	0.597	0.625
	0.593	0.621
	0.59	0.616
	0.586	0.612
	0.582	0.608
	0.579	0.604
	0.575	0.6
	0.571	0.597
	0.568	0.593
	0.564	0.589
	0.561	0.585
	0.558	0.581
	0.554	0.578
	0.551	0.574
	0.548	0.57
	0.545	0.567
	0.542	0.564
	0.539	0.56
	0.536	0.557
	0.533	0.554
	0.53	0.551
	0.527	0.548
	0.524	0.545
	0.521	0.542
	0.518	0.539
	0.515	0.535
	0.511	0.533
	0.509	0.53
	0.506	0.527
	0.503	0.524
	0.501	0.522
	0.499	0.519
	0.496	0.516
	0.494	0.514
	0.491	0.511
	0.489	0.509
	0.487	0.506
	0.485	0.504
	0.482	0.502
	0.481	0.5
	0.478	0.497
	0.476	0.495
	0.474	0.493
	0.472	0.491
	0.47	0.489
	0.468	0.487
	0.466	0.485
	0.464	0.484
	0.462	0.482
	0.46	0.481
	0.458	0.479
	0.457	0.477
	0.455	0.476
	0.453	0.475
	0.451	0.473
	0.45	0.472
	0.448	0.47
	0.446	0.469
	0.445	0.468
	0.443	0.467
	0.442	0.466
	0.44	0.465
	0.439	0.464
	0.438	0.463
	0.437	0.463
	0.436	0.462
	0.435	0.461
	0.434	0.46
	0.433	0.46
	0.432	0.459
	0.431	0.458
	0.43	0.457
	0.429	0.457
	0.428	0.456
	0.428	0.456
	0.427	0.455
	0.426	0.455
	0.425	0.454
	0.424	0.454
	0.423	0.453
	0.422	0.452
	0.422	0.452
	0.421	0.451
	0.42	0.451
	0.419	0.45
	0.419	0.45
	0.418	0.449
	0.417	0.448
	0.417	0.448
	0.416	0.447
	0.415	0.446
	0.415	0.445
	0.414	0.444
	0.413	0.443
	0.412	0.443
	0.412	0.442
	0.411	0.441
	0.41	0.44
	0.409	0.439
	0.409	0.438
	0.408	0.437
	0.407	0.436
	0.406	0.435
	0.406	0.434
	0.405	0.433
	0.404	0.432
	0.403	0.431
	0.403	0.43
	0.402	0.428
	0.401	0.427
	0.4	0.425
	0.399	0.424
	0.398	0.423
	0.397	0.421
	0.396	0.42
	0.395	0.419
	0.394	0.417
	0.393	0.416
	0.392	0.414
	0.391	0.413
	0.39	0.411
	0.389	0.409
	0.388	0.408
	0.387	0.406
	0.385	0.404
	0.384	0.402
	0.383	0.401
	0.382	0.399
	0.38	0.397
	0.379	0.395
	0.378	0.394
	0.377	0.392
	0.376	0.391
	0.374	0.389
	0.373	0.387
	0.371	0.385
	0.37	0.383
	0.369	0.382
	0.367	0.38
	0.366	0.379
	0.365	0.377
	0.363	0.375
	0.362	0.373
	0.36	0.371
	0.359	0.37
	0.357	0.368
	0.355	0.367
	0.353	0.365
	0.352	0.363
	0.351	0.361
	0.349	0.36
	0.347	0.358
	0.346	0.356
	0.344	0.355
	0.343	0.353
	0.341	0.35
	0.34	0.349
	0.338	0.347
	0.336	0.346
	0.335	0.344
	0.333	0.343
	0.332	0.341
	0.33	0.34
	0.328	0.338
	0.327	0.337
	0.325	0.335
	0.323	0.333
	0.322	0.332
	0.32	0.331
	0.319	0.329
	0.317	0.328
	0.316	0.327
	0.314	0.326
	0.313	0.325
	0.311	0.323
	0.31	0.322
	0.308	0.321
	0.307	0.32
	0.305	0.318
	0.304	0.317
	0.303	0.316
	0.301	0.314
	0.299	0.313
	0.298	0.311
	0.296	0.31
	0.295	0.309
	0.294	0.308
	0.293	0.307
	0.292	0.305
	0.29	0.304
	0.289	0.302
	0.288	0.301
	0.287	0.3
	0.286	0.299
	0.284	0.298
	0.283	0.296
	0.282	0.296
	0.281	0.295
	0.28	0.293
	0.279	0.292
	0.278	0.291
	0.277	0.29
	0.275	0.29
	0.275	0.289
	0.274	0.288
	0.272	0.287
	0.272	0.286
	0.271	0.286
	0.27	0.285
	0.269	0.284
	0.268	0.284
	0.267	0.283
	0.266	0.283
	0.265	0.283
	0.265	0.282
	0.264	0.282
	0.263	0.282
	0.262	0.281
	0.262	0.281
	0.261	0.281
	0.26	0.281
	0.26	0.282
	0.259	0.282
	0.259	0.283
	0.259	0.283
	0.258	0.284
	0.258	0.284
	0.257	0.285
	0.257	0.286
	0.257	0.286
	0.257	0.287
	0.256	0.289
	0.256	0.29
	0.256	0.291
	0.256	0.292
	0.257	0.293
	0.257	0.295
	0.257	0.296
	0.257	0.297
	0.257	0.299
	0.258	0.3
	0.259	0.302
	0.259	0.303
	0.26	0.305
	0.26	0.306
	0.261	0.308
	0.262	0.309
	0.262	0.311
	0.264	0.312
	0.265	0.313
	0.266	0.315
	0.267	0.316
	0.268	0.317
	0.269	0.319
	0.27	0.321
	0.271	0.322
	0.272	0.323
	0.273	0.324
	0.274	0.325
	0.275	0.326
	0.276	0.327
	0.277	0.328
	0.278	0.328
	0.279	0.329
	0.28	0.33
	0.281	0.331
	0.282	0.331
	0.283	0.332
	0.284	0.332
	0.285	0.332
	0.286	0.333
	0.286	0.333
	0.287	0.333
	0.288	0.334
	0.289	0.334
	0.289	0.334
	0.29	0.333
	0.291	0.333
	0.291	0.333
	0.292	0.333
	0.293	0.333
	0.293	0.332
	0.293	0.332
	0.294	0.331
	0.294	0.331
	0.295	0.33
	0.295	0.329
	0.295	0.329
	0.295	0.328
	0.295	0.327
	0.295	0.326
	0.295	0.326
	0.295	0.325
	0.295	0.324
	0.295	0.323
	0.295	0.322
	0.295	0.321
	0.294	0.32
	0.294	0.319
	0.293	0.318
	0.293	0.317
	0.293	0.316
	0.292	0.315
	0.292	0.314
	0.291	0.313
	0.29	0.311
	0.29	0.31
	0.289	0.309
	0.288	0.308
	0.287	0.307
	0.287	0.306
	0.285	0.305
	0.284	0.303
	0.283	0.302
	0.283	0.301
	0.281	0.3
	0.28	0.299
	0.28	0.298
	0.278	0.297
	0.277	0.296
	0.276	0.295
	0.275	0.294
	0.274	0.293
	0.273	0.292
	0.272	0.291
	0.271	0.29
	0.269	0.289
	0.268	0.288
	0.268	0.287
	0.266	0.286
	0.265	0.285
	0.264	0.284
	0.263	0.283
	0.262	0.282
	0.261	0.281
	0.26	0.28
	0.259	0.279
	0.258	0.278
	0.257	0.277
	0.256	0.277
	0.255	0.276
	0.254	0.275
	0.253	0.274
	0.251	0.274
	0.251	0.273
	0.25	0.272
	0.249	0.272
	0.249	0.271
	0.248	0.271
	0.247	0.27
	0.246	0.27
	0.246	0.269
	0.245	0.269
	0.244	0.269
	0.244	0.269
	0.243	0.269
	0.243	0.269
	0.242	0.269
	0.242	0.27
	0.242	0.27
	0.241	0.271
	0.241	0.272
	0.241	0.272
	0.241	0.273
	0.241	0.274
	0.241	0.275
	0.241	0.276
	0.242	0.277
	0.242	0.278
	0.242	0.28
	0.243	0.281
	0.243	0.283
	0.244	0.285
	0.245	0.287
	0.246	0.289
	0.247	0.291
	0.247	0.293
	0.249	0.295
	0.251	0.297
	0.252	0.299
	0.254	0.301
	0.255	0.304
	0.257	0.307
	0.259	0.31
	0.26	0.312
	0.262	0.314
	0.264	0.316
	0.266	0.319
	0.268	0.32
	0.27	0.323
	0.272	0.325
	0.274	0.327
	0.276	0.329
	0.278	0.331
	0.28	0.333
	0.282	0.335
	0.284	0.337
	0.286	0.338
	0.287	0.34
	0.289	0.341
	0.291	0.343
	0.293	0.344
	0.295	0.346
	0.297	0.347
	0.298	0.347
	0.3	0.349
	0.302	0.349
	0.303	0.35
	0.304	0.35
	0.306	0.351
	0.308	0.352
	0.309	0.352
	0.31	0.352
	0.311	0.352
	0.311	0.352
	0.313	0.352
	0.313	0.352
	0.314	0.352
	0.314	0.351
	0.314	0.35
	0.315	0.35
	0.315	0.349
	0.316	0.348
	0.316	0.347
	0.316	0.346
	0.315	0.346
	0.315	0.344
	0.315	0.343
	0.314	0.342
	0.314	0.341
	0.313	0.339
	0.313	0.338
	0.312	0.337
	0.311	0.335
	0.31	0.334
	0.309	0.332
	0.308	0.331
	0.307	0.329
	0.306	0.328
	0.305	0.326
	0.303	0.325
	0.302	0.323
	0.301	0.322
	0.299	0.32
	0.298	0.319
	0.296	0.316
	0.295	0.315
	0.293	0.313
	0.292	0.312
	0.291	0.31
	0.289	0.309
	0.289	0.308
	0.287	0.307
	0.286	0.305
	0.284	0.304
	0.283	0.303
	0.281	0.302
	0.28	0.301
	0.278	0.3
	0.277	0.299
	0.276	0.298
	0.275	0.298
	0.274	0.297
	0.273	0.296
	0.272	0.296
	0.271	0.296
	0.271	0.295
	0.27	0.295
	0.269	0.295
	0.269	0.295
	0.269	0.295
	0.269	0.296
	0.268	0.296
	0.269	0.296
	0.269	0.297
	0.269	0.298
	0.27	0.299
	0.27	0.299
	0.271	0.301
	0.272	0.302
	0.272	0.304
	0.274	0.305
	0.275	0.307
	0.276	0.308
	0.277	0.31
	0.279	0.312
	0.281	0.314
	0.282	0.316
	0.284	0.318
	0.286	0.32
	0.287	0.322
	0.289	0.324
	0.291	0.326
	0.293	0.329
	0.295	0.331
	0.297	0.333
	0.299	0.335
	0.302	0.337
	0.304	0.339
	0.305	0.341
	0.307	0.344
	0.309	0.346
	0.311	0.347
	0.313	0.349
	0.314	0.351
	0.316	0.353
	0.318	0.355
	0.319	0.356
	0.321	0.358
	0.322	0.359
	0.323	0.361
	0.324	0.362
	0.325	0.364
	0.326	0.365
	0.327	0.365
	0.328	0.366
	0.329	0.367
	0.33	0.367
	0.33	0.37
	0.331	0.373
	0.331	0.371
	0.332	0.37
	0.332	0.369
	0.332	0.368
	0.332	0.368
	0.332	0.368
	0.332	0.367
	0.332	0.367
	0.332	0.366
	0.331	0.365
	0.331	0.364
	0.33	0.363
	0.329	0.362
	0.328	0.361
	0.327	0.359
	0.326	0.358
	0.325	0.356
	0.324	0.355
	0.323	0.353
	0.322	0.352
	0.32	0.35
	0.319	0.349
	0.318	0.347
	0.317	0.344
	0.315	0.343
	0.314	0.341
	0.312	0.339
	0.311	0.338
	0.31	0.336
	0.308	0.334
	0.307	0.333
	0.305	0.331
	0.304	0.33
	0.303	0.328
	0.301	0.327
	0.3	0.326
	0.299	0.325
	0.298	0.324
	0.297	0.323
	0.296	0.322
	0.295	0.321
	0.295	0.32
	0.294	0.32
	0.294	0.32
	0.294	0.319
	0.293	0.319
	0.293	0.319
	0.294	0.319
	0.294	0.319
	0.295	0.32
	0.295	0.32
	0.296	0.321
	0.296	0.322
	0.297	0.323
	0.298	0.325
	0.299	0.326
	0.301	0.327
	0.302	0.329
	0.303	0.331
	0.304	0.332
	0.306	0.334
	0.307	0.335
	0.309	0.337
	0.31	0.339
	0.312	0.341
	0.313	0.343
	0.315	0.345
	0.316	0.347
	0.318	0.349
	0.319	0.351
	0.321	0.353
	0.322	0.354
	0.324	0.356
	0.325	0.358
	0.326	0.359
	0.328	0.361
	0.329	0.362
	0.33	0.364
	0.331	0.365
	0.332	0.366
	0.333	0.367
	0.334	0.368
	0.334	0.368
	0.335	0.369
	0.335	0.37
	0.335	0.37
	0.336	0.371
	0.336	0.371
	0.336	0.371
	0.336	0.37
	0.336	0.37
	0.336	0.37
	0.336	0.369
	0.335	0.369
	0.335	0.369
	0.334	0.368
	0.334	0.367
	0.333	0.367
	0.332	0.366
	0.332	0.365
	0.331	0.364
	0.33	0.362
	0.329	0.361
	0.328	0.36
	0.327	0.358
	0.326	0.357
	0.325	0.356
	0.323	0.354
	0.322	0.353
	0.321	0.352
	0.32	0.35
	0.319	0.349
	0.318	0.347
	0.317	0.346
	0.316	0.345
	0.315	0.344
	0.314	0.343
	0.314	0.341
	0.313	0.34
	0.312	0.34
	0.312	0.338
	0.311	0.338
	0.311	0.337
	0.311	0.337
	0.311	0.337
	0.311	0.337
	0.311	0.337
	0.311	0.337
	0.311	0.337
	0.311	0.338
	0.312	0.338
	0.313	0.339
	0.313	0.34
	0.314	0.34
	0.314	0.341
	0.315	0.343
	0.316	0.344
	0.317	0.345
	0.317	0.346
	0.319	0.347
	0.319	0.349
	0.32	0.35
	0.321	0.351
	0.322	0.353
	0.323	0.354
	0.325	0.355
	0.325	0.357
	0.326	0.358
	0.328	0.36
	0.328	0.361
	0.329	0.362
	0.33	0.363
	0.331	0.365
	0.332	0.366
	0.333	0.367
	0.334	0.368
	0.334	0.368
	0.335	0.369
	0.336	0.369
	0.337	0.37
	0.337	0.37
	0.337	0.37
	0.338	0.37
	0.338	0.371
	0.338	0.371
	0.338	0.37
	0.338	0.37
	0.338	0.37
	0.338	0.369
	0.338	0.368
	0.338	0.368
	0.337	0.367
	0.337	0.367
	0.337	0.365
	0.336	0.365
	0.335	0.364
	0.335	0.363
	0.334	0.362
	0.333	0.36
	0.332	0.359
	0.332	0.358
	0.331	0.357
	0.33	0.356
	0.329	0.355
	0.329	0.354
	0.328	0.353
	0.327	0.352
	0.326	0.352
	0.325	0.351
	0.325	0.35
	0.324	0.35
	0.323	0.349
	0.323	0.349
	0.322	0.349
	0.322	0.349
	0.322	0.349
	0.322	0.349
	0.322	0.349
	0.322	0.349
	0.322	0.35
	0.322	0.35
	0.322	0.351
	0.322	0.352
	0.323	0.352
	0.323	0.353
	0.324	0.354
	0.325	0.355
	0.325	0.356
	0.326	0.357
	0.327	0.358
	0.328	0.359
	0.328	0.361
	0.329	0.362
	0.33	0.362
	0.331	0.364
	0.331	0.364
	0.332	0.365
	0.333	0.366
	0.334	0.367
	0.334	0.367
	0.335	0.368
	0.335	0.368
	0.336	0.369
	0.336	0.369
	0.337	0.369
	0.337	0.369
	0.337	0.369
	0.338	0.369
	0.338	0.369
	0.338	0.369
	0.338	0.368
	0.338	0.368
	0.338	0.368
	0.337	0.367
	0.337	0.367
	0.337	0.366
	0.337	0.365
	0.336	0.365
	0.336	0.364
	0.335	0.363
	0.335	0.362
	0.334	0.362
	0.334	0.361
	0.333	0.361
	0.332	0.36
	0.332	0.359
	0.331	0.359
	0.331	0.358
	0.331	0.357
	0.33	0.357
	0.329	0.356
	0.329	0.356
	0.329	0.356
	0.329	0.356
	0.328	0.356
	0.328	0.356
	0.328	0.356
	0.328	0.356
	0.328	0.356
	0.328	0.356
	0.328	0.356
	0.329	0.357
	0.329	0.358
	0.329	0.358
	0.33	0.359
	0.331	0.359
	0.331	0.36
	0.331	0.361
	0.332	0.361
	0.332	0.362
	0.333	0.363
	0.334	0.364
	0.334	0.364
	0.335	0.365
	0.335	0.365
	0.336	0.366
	0.336	0.367
	0.337	0.367
	0.337	0.367
	0.337	0.367
	0.338	0.367
	0.338	0.367
	0.338	0.367
	0.338	0.367
	0.339	0.367
	0.339	0.366
	0.339	0.366
	0.339	0.366
	0.339	0.365
	0.339	0.365
	0.339	0.364
	0.339	0.364
	0.339	0.364
	0.338	0.363
	0.338	0.362
	0.338	0.362
	0.338	0.362
	0.337	0.361
	0.337	0.361
	0.337	0.36
	0.336	0.36
	0.336	0.359
	0.336	0.36
	0.335	0.359
	0.335	0.359
	0.335	0.359
	0.335	0.359
	0.334	0.359
	0.334	0.359
	0.334	0.359
	0.334	0.359
	0.334	0.359
	0.334	0.36
	0.334	0.36
	0.334	0.36
	0.334	0.361
	0.334	0.361
	0.334	0.361
	0.335	0.362
	0.335	0.362
	0.335	0.362
	0.335	0.362
	0.336	0.363
	0.336	0.363
	0.337	0.363
	0.337	0.364
	0.337	0.364
	0.338	0.364
	0.338	0.364
	0.338	0.364
	0.339	0.364
	0.339	0.364
	0.34	0.364
	0.34	0.363
	0.34	0.363
	0.341	0.363
	0.341	0.363
	0.341	0.362
	0.341	0.362
	0.341	0.366
	0.341	0.364
	0.341	0.362
	0.341	0.362
	0.341	0.361
	0.341	0.361
	0.341	0.36
	0.341	0.36
	0.341	0.359
	0.341	0.359
	0.34	0.359
	0.34	0.359
	0.34	0.359
	0.34	0.358
	0.34	0.358
	0.34	0.358
	0.34	0.358
	0.34	0.358
	0.34	0.358
	0.34	0.358
	0.34	0.359
	0.34	0.359
	0.34	0.359
	0.34	0.359
	0.34	0.359
	0.34	0.359
	0.341	0.359
	0.341	0.359
	0.341	0.359
	0.342	0.359
	0.342	0.359
	0.343	0.359
	0.343	0.359
	0.343	0.359
	0.344	0.359
	0.344	0.359
	0.344	0.359
	0.345	0.359
	0.345	0.359
	0.345	0.359
	0.346	0.358
	0.346	0.358
	0.346	0.358
	0.346	0.358
	0.346	0.358
	0.346	0.357
	0.346	0.357
	0.346	0.357
	0.346	0.356
	0.346	0.356
	0.346	0.356
	0.346	0.356
	0.346	0.356
	0.346	0.356
	0.346	0.356
	0.346	0.356
	0.346	0.356
	0.346	0.356
	0.346	0.356
	0.346	0.356
	0.346	0.356
	0.346	0.356
	0.347	0.356
	0.347	0.356
	0.347	0.356
	0.347	0.357
	0.347	0.357
	0.348	0.357
	0.348	0.357
	0.348	0.357
	0.348	0.357
	0.348	0.357
	0.349	0.357
	0.349	0.357
	0.349	0.357
	0.349	0.357
	0.349	0.357
	0.349	0.357
	0.349	0.357
	0.349	0.357
	0.349	0.357
	0.349	0.356
	0.349	0.356
	0.349	0.356
	0.349	0.356
	0.349	0.356
	0.349	0.356
	0.349	0.356
	0.349	0.356
	0.349	0.355
	0.349	0.355
	0.349	0.355
	0.348	0.356
	0.348	0.355
	0.348	0.355
	0.348	0.355
	0.348	0.355
	0.348	0.355
	0.348	0.354
	0.348	0.354
	0.348	0.354
	0.347	0.354
	0.347	0.354
	0.347	0.353
	0.347	0.353
	0.347	0.353
	0.347	0.353
	0.347	0.353
	0.347	0.352
	0.346	0.352
	0.346	0.352
	0.346	0.351
	0.346	0.35
	0.346	0.35
	0.345	0.35
	0.345	0.349
	0.344	0.349
	0.344	0.348
	0.344	0.347
	0.343	0.347
	0.343	0.346
	0.343	0.346
	0.343	0.345
	0.342	0.344
	0.342	0.344
	0.342	0.343
	0.341	0.343
	0.341	0.342
	0.341	0.342
	0.341	0.341
	0.34	0.34
	0.339	0.34
	0.338	0.339
	0.338	0.338
	0.337	0.338
	0.337	0.337
	0.338	0.336
	0.337	0.335
	0.336	0.335
	0.335	0.334
	0.334	0.334
	0.334	0.333
	0.333	0.332
	0.332	0.331
	0.332	0.331
	0.331	0.33
	0.331	0.329
	0.33	0.328
	0.329	0.328
	0.329	0.327
	0.328	0.326
	0.328	0.326
	0.327	0.325
	0.326	0.324
	0.326	0.323
	0.325	0.323
	0.324	0.322
	0.323	0.322
	0.323	0.321
	0.322	0.32
	0.322	0.319
	0.321	0.318
	0.32	0.317
	0.32	0.317
	0.319	0.316
	0.319	0.316
	0.318	0.315
	0.317	0.314
	0.316	0.313
	0.316	0.313
	0.315	0.312
	0.314	0.311
	0.313	0.311
	0.313	0.31
	0.312	0.309
	0.311	0.308
	0.31	0.308
	0.31	0.307
	0.309	0.306
	0.308	0.305
	0.308	0.305
	0.307	0.304
	0.307	0.303
	0.306	0.302
	0.305	0.301
	0.304	0.301
	0.304	0.3
	0.303	0.299
	0.302	0.298
	0.301	0.298
	0.3	0.297
	0.299	0.296
	0.299	0.295
	0.298	0.294
	0.297	0.293
	0.296	0.292
	0.295	0.291
	0.295	0.29
	0.293	0.29
	0.293	0.289
	0.292	0.288
	0.291	0.287
	0.29	0.287
	0.289	0.286
	0.289	0.285
	0.287	0.284
	0.287	0.283
	0.286	0.283
	0.285	0.282
	0.284	0.281
	0.284	0.28
	0.283	0.28
	0.282	0.279
	0.282	0.278
	0.281	0.277
	0.28	0.276
	0.28	0.275
	0.279	0.274
	0.278	0.273
	0.277	0.272
	0.276	0.271
	0.275	0.27
	0.275	0.27
	0.274	0.269
	0.274	0.268
	0.273	0.267
	0.272	0.266
	0.271	0.265
	0.271	0.265
	0.27	0.263
	0.269	0.263
	0.268	0.262
	0.268	0.261
	0.267	0.26
	0.266	0.26
	0.265	0.259
	0.264	0.258
	0.264	0.257
	0.263	0.256
	0.262	0.256
	0.262	0.255
	0.261	0.255
	0.261	0.255
	0.26	0.254
	0.26	0.252
	0.26	0.251
	0.259	0.251
	0.259	0.25
	0.258	0.249
	0.257	0.249
	0.257	0.248
	0.256	0.247
	0.256	0.247
	0.254	0.246
	0.253	0.246
	0.252	0.245
	0.251	0.244
	0.25	0.244
	0.25	0.243
	0.249	0.243
	0.249	0.242
	0.249	0.241
	0.249	0.241
	0.248	0.24
	0.249	0.24
	0.249	0.239
	0.249	0.238
	0.249	0.238
	0.249	0.238
	0.25	0.237
	0.251	0.237
	0.252	0.237
	0.253	0.236
	0.254	0.236
	0.255	0.235
	0.256	0.235
	0.258	0.234
	0.259	0.234
	0.26	0.234
	0.262	0.233
	0.263	0.233
	0.264	0.232
	0.265	0.232
	0.266	0.232
	0.268	0.232
	0.269	0.232
	0.269	0.232
	0.27	0.233
	0.27	0.234
	0.27	0.235
	0.27	0.236
	0.269	0.237
	0.269	0.238
	0.269	0.24
	0.268	0.241
	0.268	0.242
	0.267	0.244
	0.267	0.246
	0.266	0.248
	0.266	0.25
	0.266	0.252
	0.266	0.254
	0.266	0.256
	0.266	0.257
	0.266	0.259
	0.267	0.26
	0.268	0.262

## Sheet: Supplementary Fig.3
	Supplementary Fig. 3b Intensity of PTEN/GAPDH normalized to NT-HCV-IIIabc				Supplementary Fig. 3c Intensity of PTEN/GAPDH normalized to NT-HCV-IIIabc
	NT-HCV-IIIabc	PTEN-g2-HCV-IIIabc			NT-HCV-IIIabc	PTEN-g2-HCV-IIIabc
	0.992197	1.58642			1.00163	1.37409
	0.882397	1.85683			1.09035	1.80033
	1.12541	1.23111			0.908019	1.48555
	1.2066	1.05348
	1.00318	1.8218			Test pair	NT vs. PTEN
	0.790217	2.54857			P value	0.0347
	Test pair	NT vs. PTEN
	P value	0.0127
					Supplementary Fig. 3e Intensity of PTEN/GAPDH normalized to NT-EMCV-JK
					NT-EMCV-JK	PTEN-g2-EMCV-JK
					0.674693	1.82662
	Supplementary Fig. 3d Fluc signal/ Rluc signal normalized to vector				0.750061	1.6313
	vector	Fluc-EMCV	Fluc-EMCV-JK		1.07403	2.26031
	0.969269	1.16037	1.88213		1.50122	2.40844
	0.975447	1.4719	2.20265		1.04636	1.36167
	1.05528	1.93511	1.79693		0.80696	1.21566
	0.86214	1.9102	1.38779		1.14668	1.32183
	Test vector vs.	Fluc-EMCV	Fluc-EMCV-JK		Test pair	NT vs. PTEN
	P value	0.0211	0.0049		P value	0.0063
	Supplementary Fig. 3f Fluc signal/ Rluc signal normalized to vector
	vector	Fluc-PTV	Fluc-PTV-IIIab	Fluc-EMCV	Fluc-EMCV-JK	NT-PTV-IIIab
	0.966983	1.49428	2.14651	2.47466	1.83162	1.24289
	0.888225	1.64004	1.33282	2.05422	1.25822	1.15112
	0.931314	1.72305	1.88352	1.53154	1.63183	0.893765
	1.21348	2.09883	1.90774	1.66016	1.57873	1.33374
	Test vector vs.	Fluc-PTV	Fluc-PTV-IIIab	Fluc-EMCV	Fluc-EMCV-JK	NT vs PTV-IIIab
	P value	0.0083	0.0034	0.001	0.0493	0.0193
	Supplementary Fig. 3k Intensity normalized to NT-PTV-IIIab
		NT-PTV-IIIab				PTEN-PTV-IIIab+ CDKN1A-PTV-IIIab
	PTEN/GAPDH	1.13117	1.06304	0.735223	1.07056	1.38757	1.29728	1.32282	1.6358
	CDKN1A/GAPDH	0.996837	1.11674	0.828302	1.05812	1.32413	1.5478	1.23773	1.24505
	Test NT vs PTEN+CDKN1A		PTEN/GAPDH	CDKN1A/GAPDH
	P value		0.01257	0.01373

## Sheet: Supplementary Fig.4
	Supplementary Fig. 4a Intensity of PTEN/GAPDH normalized to NT-PTV-IIIab			Supplementary Fig. 4b Luminescence signal (RLU)
	NT	mPTEN			DPBS treatment			LNP-luciferase mRNA treatment
	0.885115	1.50354		HEK293T	7	10	6	227	279	282
	0.838179	1.83218		NIH/3T3	3	2	5	22	14	11
	1.27671	1.83122		3T3-L1	2	7	3	5	4	14
				N2a	11	3	8	71	63	78
	Test pair	NT vs mPTEN
	P value	0.0151		Test DPBS vs LNP-mRNA	HEK293T	NIH/3T3	3T3-L1	N2a
				P value	0.000141	0.022196	0.357316	0.00021
	Supplementary Fig. 4c Intensity of PTEN/GAPDH normalized to NT-PTV-IIIab			Supplementary Fig. 4e Intensity of PTEN/GAPDH normalized to 10ng NT-PTV-IIIab
	NT	mPTEN
	0.737761	1.87407		gRNA linked to PTV-IIIab	NT		mPTEN
	1.33094	2.31771		amount of taRNA (ng)	10	1000	10	25	100	250	500	1000
	0.931301	1.98463		PTEN/GAPDH	1	0.940689	0.974121	1.24704	1.26946	1.40363	1.40971	1.28772
	0.887591	1.59676
	0.922673	1.85929
	1.18974	1.06967
	Test pair	NT vs mPTEN
	P value	0.0023
	Supplementary Fig. 4g Intensity of PTEN/GAPDH normalized to NT-PTV-IIIab
	NT	mPTEN
	0.996805	1.30458
	1.03859	1.05777
	0.980491	1.06442
	0.984111	1.39257
	Test pair	NT vs mPTEN
	P value	0.0546

[truncated: 2 more sheets: Supplementary Fig.5, Supplementary Fig.6]
